# Supplementary material for: Theoretical modeling of hepatitis C acute infection in liver-humanized mice support pre-clinical assessment of candidate viruses for controlled-human-infection studies
Source: Springer Nature journal article supplement (doi:10.1038/s41598-024-83104-0), 2024-12-30
Supplement: MOESM1 [file 41598_2024_83104_MOESM1_ESM.docx]

# Supplementary Material

**Theoretical approaches for developing hepatitis C virus controlled human infection models**

Zhenzhen Shi1#, Adquate Mhlanga1#, Yuji Ishida2#, Ari Josephson1, Nicholson T. Collier3, Hiromi Abe-Chayama4, Chise Tateno-Mukaidani2, Scott J Cotler1, Jonathan Ozik3, Marian Major5, Jordan J. Feld6, Kazuaki Chayama 7,8*, Harel Dahari1*

1 The Program for Experimental & Theoretical Modeling, Division of Hepatology, Department of Medicine, Stritch School of Medicine, Loyola University Chicago, Maywood, IL, USA;

2 PhoenixBio Co., Ltd., Higashi-Hiroshima, Japan;

3 Decision and Infrastructure Sciences Division, Argonne National Laboratory, Lemont, IL and Consortium for Advanced Science and Engineering, University of Chicago, Chicago, IL;

4 Center for Medical Specialist Graduate Education and Research, Hiroshima University, Hiroshima, Japan;

5 Division of Viral Products, Center for Biologics Evaluation and Research, Food and Drug Administration, Silver Spring, Maryland, USA

6Toronto Centre for Liver Disease, Toronto, ON, Canada;

7 Hiroshima Institute of Life Sciences, Hiroshima, Japan;

8 RIKEN Center for Integrative Medical Sciences, Yokohama, Japan.

# Equally contributed.

*** Correspondence:**

Harel Dahari: hdahari@luc.edu

Kazuaki Chayama: chayama@mba.ocn.ne.jp

**A: Basic Model**

The initial ODE model consisted of the following three equations, adapted from a previous mathematical model of acute HCV in chimpanzees (Gastroenterology 2005;128:1056-66)

(Eq. S1)

The variables and parameters are the same in Eq. S1) as described for the two-equation model (**Eq.1**) in the main manuscript except for variable V in Eq. S1 that represents both inoculated virus ,Ve, and produced virus from infected cells ,Vm , in Eq. 1.

Although this model captures the biphasic increase, transient decline, and plateau, it did not reproduce well the magnitude of HCV drop at 6 hr post infection (p.i.), i.e., two orders of magnitude above the measured data (**Fig. S1A**).

**B: Basic Model with Eclipse Phase**

To try to capture the magnitude of viral drop by 6 hr p.i., an eclipse phase during which infected cells are not productive thus allowing a time delay in producing virions by infected cells while inoculated virus is cleared from blood was assumed. This was included in **Eq. S2** as described below:

(Eq. S2)

where *Ie* represents infected cells in the eclipse phase before they become productively infected cells, *Im*, at a rate of . We performed sensitivity analysis on Ωe and found nearly identical model curves under eclipse phase durations ranged from 7 to 80 hours (not shown). Since Ωe and β parameters are highly correlated, resulting in a coupling effect that made it challenging to estimate both parameters accurately, was fixed at 2.4 day-1 (i.e., eclipse phase duration of 10 hours) based on the in vitro findings of Lindenbach et al. (PMID: 15947137**)** which aligns well within the eclipse duration range (1-52 hours) estimated by the ABM model (Table 2).

The model was improved by 7 points (based on Akaike Information Criterion, AIC) compared to **Eq. S1** but was still an order of magnitude above observed data (**Fig. S1B**).

**C: Necessity of Two Populations of Virus with Different Infection Rates**

We explored another model which is used in the main manuscript (**Eq. 1**). It consists of splitting the virus into two populations: inoculated virus and virions produced by infected human hepatocytes. We assume that the difference between these two populations is in their infectivity, with the inoculated virus having a lower infection rate, , potentially due to damage to the viral envelope from being frozen for an extended period. This allows for a time delay in producing virions by infected cells while inoculated virus is cleared from blood. had to be held fixed due to identifiability issues with . We explored a range of values from to mL/virions/day in Berkeley Madonna, and found that mL/virions/day ( mL/virions/hour) provided the best fits to the data for the remaining parameters. The results of fitting the two-population model (**Eq. 1**) with the measured data (**Fig. S1C**) had the lowest AIC (4 point lower than **Eq. S2**).


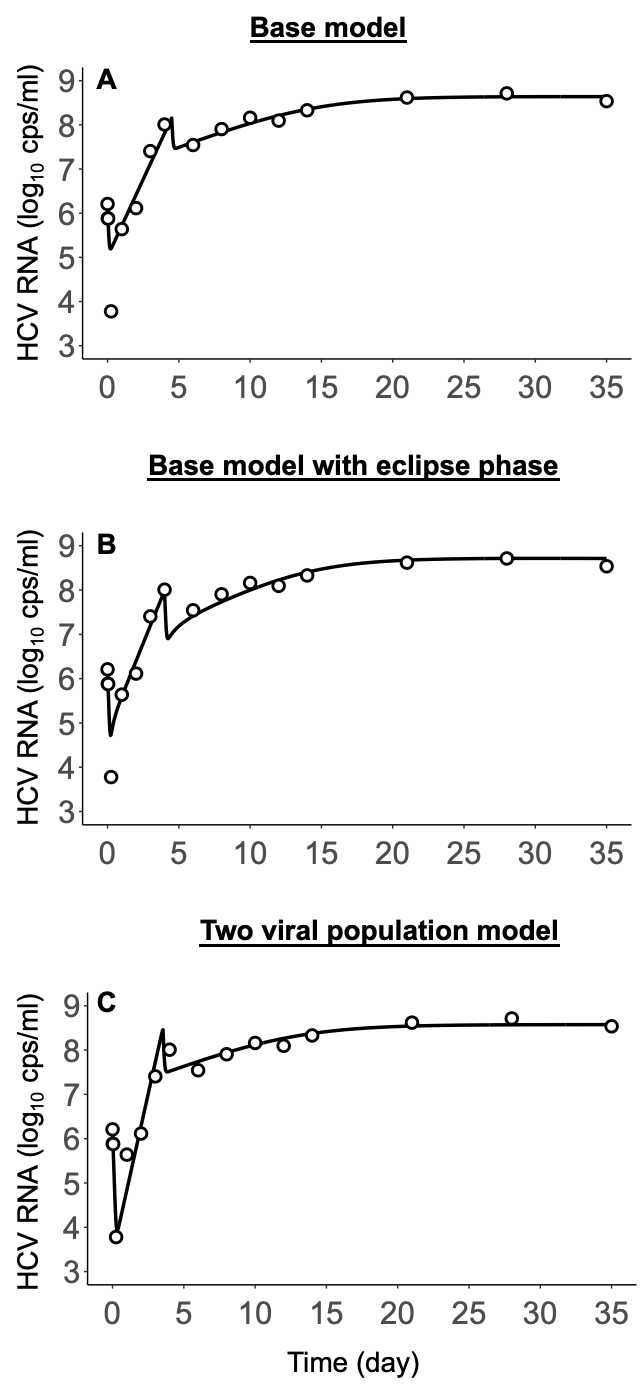


**Fig. S1**. Measured serum HCV-RNA kinetics (open circles) for mouse 1 (M1) and corresponding models’ fit curves (solid lines) using Eq. S1 (**A) Eq. S2 (B) and Eq. 1 (C**). The estimated models’ parameters are: (A) mL/virions/hour, %, = 7.74 virions/cell/hr, (B) mL/virions/hour, %, = 13.65 virions/cell/hr, and (C) mL/virions/hour, %, = 15.37 virions/cell/hr. In (A), (B) and (C), we set parameters , η=0, and *c=22.2 day-1*. Parameter tir was fixed to 4.2, 4.0 and 3.5 days in (A), (B) and (C), respectively. AIC values for the evaluate models: Base model (A) = -24, base model with eclipse phase (B) = -31, and the two-viral population model, i.e., Eq. 1 in the main manuscript (C) = -35. The remaining parameters in each model were fixed as provided in the above respective modeling sections and in the main manuscript for Eq. 1.

**D: Blocking of Viral Production vs. Blocking of Viral Infection**

Mice 3 (M3) and 4 (M4) did not exhibit a transient decline, instead they switched from a rapid increase phase to a slower increase phase around day 5. Because a transient decline is cause by a blocking of production (*ε*) in model, we explored using only blocking of infection () for these two mice to explain the decreasing slope of the viral load. The results of that fit are shown in the top row of **Fig. S2**.

The results clearly indicate that for M3 and M4, using only blocking of infection results in a poorer fit compared to using only blocking of production. For both mice, the AIC and MSE of the models indicate that blocking of production produces better agreement with the data, as shown in **Table S1**.

**Table S1**. Goodness-of-fit comparison for blocking of viral production () or infection (). Akaike Information Criterion (AIC) as calculated by lmfit for ODE and mean squared error (MSE) was calculated for ABM using mean function in R.

|  | AIC* | | MSE* | |
| --- | --- | --- | --- | --- |
|  | Only Blocking of Infection () | Only Blocking of Production ( | Only Blocking of Infection () | Only Blocking of Production ( |
| M1 | -29 | -35 | 0.146 | 0.0775 |
| M2 | -30 | -36 | 0.0799 | 0.0480 |
| M3 | -28 | -34 | 0.129 | 0.0737 |
| M4 | -32 | -47 | 0.0607 | 0.0372 |
| M5 | -31 | -34 | 0.270 | 0.135 |

*A lower AIC or MSE means better agreement with the data.


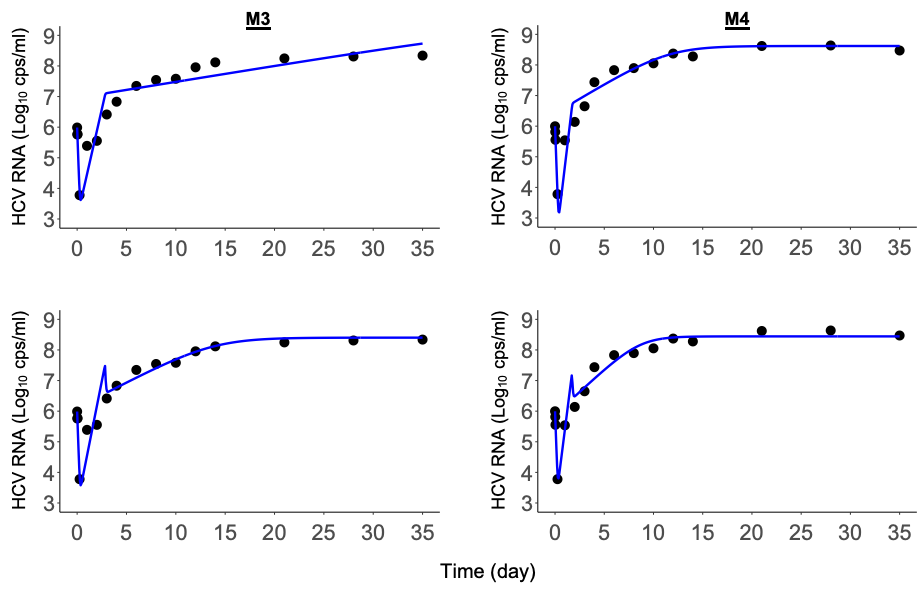


**Fig. S2**. A comparison of fitting the model with only blocking of infection (top row) and blocking of production (bottom row). The kinetics of serum HCV-RNA are depicted by solid black circles, while the model fit is represented by blue solid lines.

**Fig. S3.** **HCV virion production profile for each mouse from the initial inoculation to 7 days p.** **i.** Individual cells had randomized eclipse phases (black-shaded “E”) followed by a consistent virion production pattern. Left panel shows the production rate under minimal eclipse (Ωmin) phase and right panel shows the production rate under maximal eclipse phase (Ωmax). M1-M4 initially started with ~ 25 virions/cell/hr, and M5 had a substantial production rate of ~150 virions/cell/hr. This may be related to the high HCV RNA level observed around 5 days p.i. in M5 as shown in **Fig. 4**. After virion production drops, all five mice produced 1 virion/cell/hr from ~5 days p.i. to 35 days p.i. The virion production rate was calculated using **Eq. 2** and **Eq. 3**. The parameter values (*vpaf*, α, Pst, γ, δ, ω) used in **Eq. 2** and **Eq. 3** were the parameter values estimated in **Table 2**.


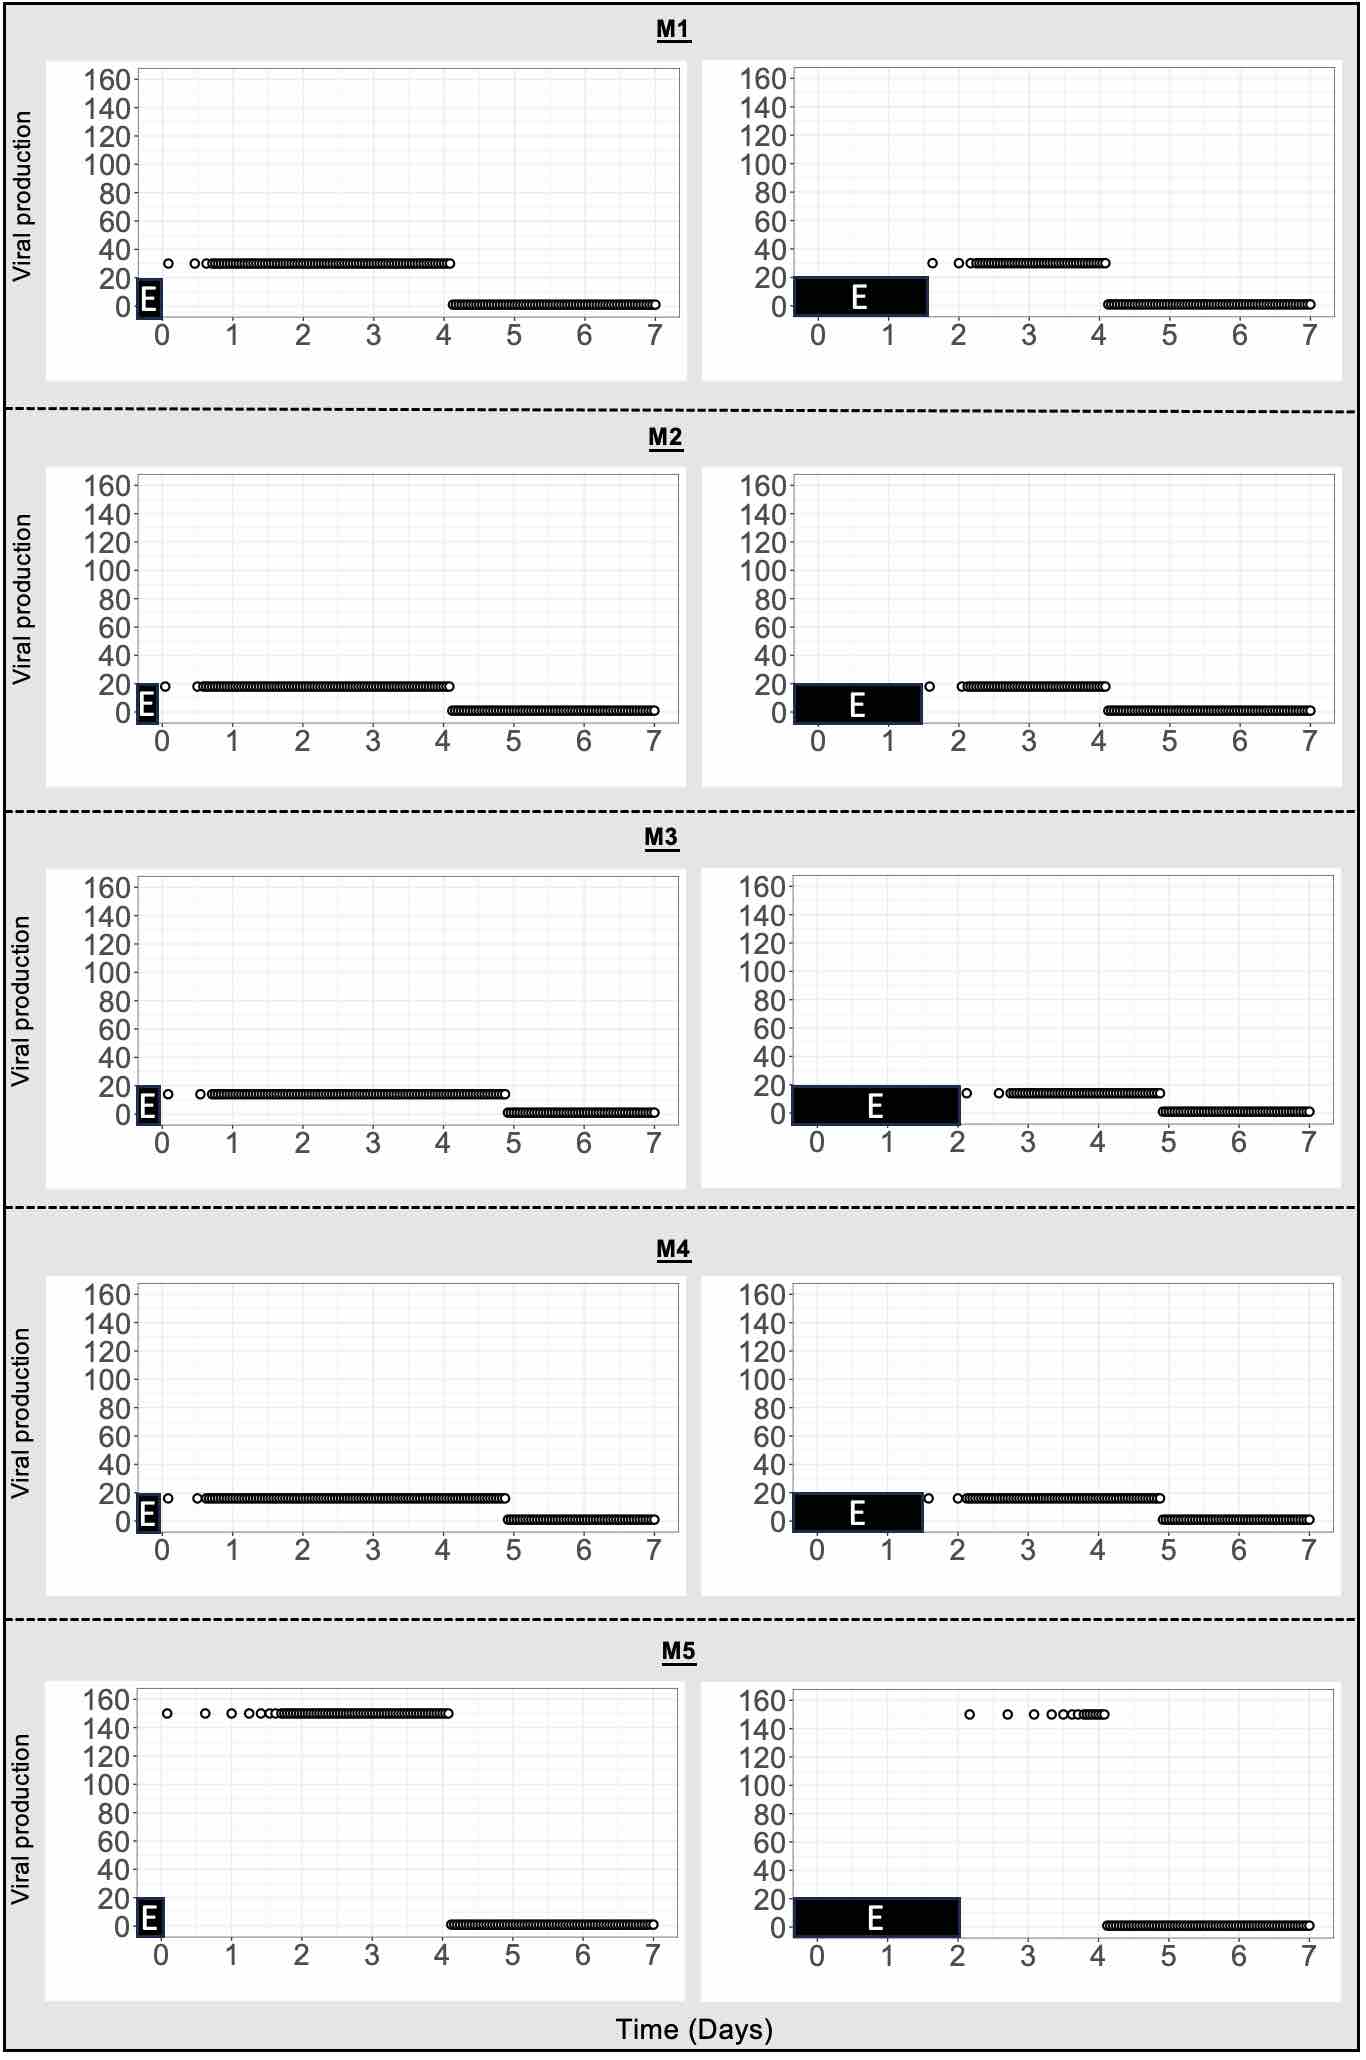


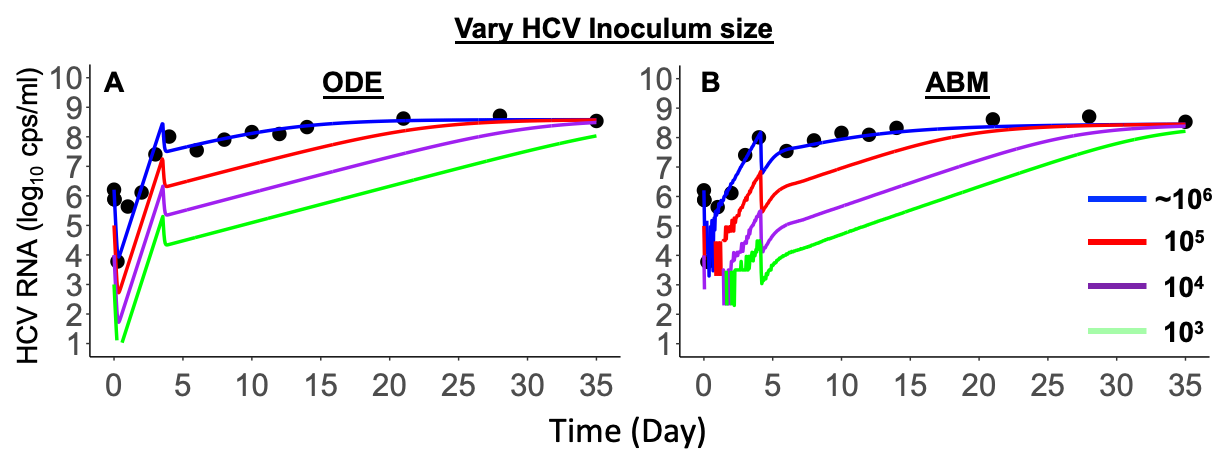


**Fig. S4**. Varying the HCV inoculum size using the ODE (A) and ABM (B) models.

**Table S2.** Comparison between ODE and ABM features for modeling acute HCV infection kinetics.

| ODE | ABM | Comment (comparison) |
| --- | --- | --- |
| - In efforts to explain the fast decline observed at early stage of HCV dynamics (**Fig. 3**), modeling (**Eq. 1**) assumed two virion populations without assuming eclipse phase (see **Supplementary Materials** why the basic model (Eq. S1) and the basic model that accounts for ecplise phase (Eq. S2) were not able to fit well the data). The two-virion population includes:   A 60 to 260-fold less infectious inoculated virion population (Ve), (see, Table 1)  Virion population that was produced by infected human hepatocytes (Vm) | Only one viral population was assumed with a random eclipse phase (Ωmin ~ Ωmax) assumption (**Fig. 2** and **Table 2**) to mimic the progression of acute HCV infection in the ABM | From a biological perspective, viruses need an eclipse phase to produce virions. But including the eclipse phase in ODE did not capture the minimal viral load. By using a large range (7-80 hours) of eclipse phase duration, the model resulted in nearly identical curves across the tested values (not shown). This was due to identifiability issues, since Ωe and β are highly correlated, resulting in a coupling effect that made it challenging to estimate the Ωe accurately using the ODE model. (see **Supplementary Materials Model B (Eq. S2) and Fig. S1B** in detail). The specific dynamics and timing of the eclipse phase may not be well represented in ODE due to the assumption of homogeneity and averaging. In ODE, two virion population needs to be assumed to capture the minimal viral load (see **Supplementary Materials** **Model C (Eq. 1) and Fig. S1C** in detail). However, ABM can capture the minimal viral level (i.e., HCV RNA level lower than quantifiable limit) by assuming only one virion population, probably due to the eclipse phase assigned to each infected cell and the linearized clearance rate for each simulation step. ABM estimates that the eclipse phase can range from 1 to 52 hours |
| - Once the cells were infected, they immediately started producing virions | - After passing the eclipse phase, the infected cells gradually released virions based on the predefined production cycle (**Fig. 2**) | ABM can simulate heterogeneity with cells at different stages of production, which makes sense in a biological way. Initially, all mice started with a long production cycle (9-12 hours) for producing more than 10 virions (i.e., *vpaf* in **Table 2**). Within 3 days p.i. the time interval between each production cycle dropped to 1 hr with a low production rate of 1 virion/cell. |
| - Five unknown model parameters needed to be estimated, which includes:  1. Time at viral production drops (*tir*) 2. Infection rate of virions produced by the mouse (βm) 3. Virion production rate before *tir* (*p*) 4. Efficacy in blocking viral production (ε) 5. Virion clearance rate (*c*) | - Eleven unknown model parameters needed to be estimated, which includes:  1. Time at viral production drops (*tir*) 2. Infection rate (β) 3. Virion production rate at steady state after *tir* (Pst) 4. Efficacy in blocking viral production (ε) 5. Virion clearance rate (*c*) 6. Min eclipse phase (Ωmin) 7. Max eclipse phase (Ωmax) 8. Initial production cycle length (δ) 9. Decay constant (ω) 10. Number of cycles to reach 50% of Pst (α) 11. Steepness of the production curve (γ) | Five parameters in ABM are comparable to the parameters in ODE (highlighted in red) (**Table 1** and **Table 2**). Six more parameters related to virion production cycle (highlighted in in blue) were needed in ABM (also see **Table 2**). Compared to ODE, estimating those parameters in ABM could be more computationally challenging (cost) when fit to experimental data. In ODE, model calibration using LMFIT module in Python took 10-15 minutes on an HP Pavilion x360 model 15-br095ms. In the ABM, it took approximately 4.8 hours using full concurrency on 6 nodes (with 36 cores per node), or about 1037 core hours to calibrate model parameters using the HPC workflow (see **Materials and methods** in detail). |
| - Suggests an infection rate (denoted as βm in **Table 1**) of 5.1 ± 3.3 x 10-11 mL/virions/hr | - Suggests an infection rate (denoted as β in **Table 2**) of 18.5 ± 3.5 x 10-11 cell/hr | ODE suggests a ~10-fold higher infection rate compared to that estimated in ABM. This may be associated with a more rapid ascension phase predicted by ODE compared to that was predicted by ABM (**Fig. 4**). |
| - Suggests a constant production rate (*p*) of (11.2 ± 7.9) virion/cell/hr before tir (i.e., time at virion production drops, see **Table 1**) and (1.0 ± 0.3) virion/cell/hr after tir | - Suggests a high production rate with different production cycles before tir (**Fig. S3**) and a constant production rate (denoted as Pst in **Table 2**) of 1 virion/cell/hr for all five mice at the steady state (after tir) | In the ABM, because a simulation agent needs to be an integer rather than a fraction, an infected cell at a productive stage needs to produce at least one virion per cell (**Table 2**). In the ODE, an infected cell can produce less than 1 virion on average (**Table 1**). |
| - Suggests that efficacy in blocking viral production (denoted as ε in **Table 1**) is (92.1% ± 0.02%). This event occurred at (2.8 ± 0.7 days) p.i. when viral production drops (denoted as tir in **Table 1**) | - Suggests that efficacy in blocking viral production (denoted as ε in **Table 2**) is (94.3% ± 2.7%). This event occurred at (4.1 ± 0.4 days) p.i. when viral production drops (denoted as tir in **Table 2**) | Compared to ODE, ABM suggests a ~5% higher efficacy in blocking viral production that maybe associated with a later tir, which is the estimated time when viral production drops (**Table 1**, **Table 2,** and **Fig. 4**). More frequent sampling around this time event would help provide a more precise estimation regarding the transit decline in the HCV RNA level. |

**Table S3.** Measured HCV RNA data in both SCID-M (Mice 6-10) and SCID-MhL (Mice 1-5) mice.

| Time (p.i.)/Mice | 1 | 2 | 3 | 4 | 5 | 6 | 7 | 8 | 9 | 10 |
| --- | --- | --- | --- | --- | --- | --- | --- | --- | --- | --- |
| 1min | 1620333.98 | 1519823.29 | 973672.632 | 991898.071 | 1310160.21 | 845324.194 | 1203191.31 | 1369576.9 | 1122448.1 | 1058850.44 |
| 0.5h | 769177.002 | 585486.694 | 574809.521 | 649546.582 | 719972.021 | 135896.265 | 94085.2844 | 162316.058 | 129241.937 | 111957.596 |
| 1h | 756126.563 | 332997.253 | 591131.543 | 358227.136 | 652202.71 | +/-* | - | +/-* | +/-* | - |
| 6h | - | +/-* | +/-* | - | - | - | - | - | - | +/-* |
| d1 | 435798.34 | 405844.849 | 245160.919 | 344586.584 | 815321.265 | - | - | - | +/-* | - |
| d2 | 1302902.93 | 1706398.24 | 357422.314 | 1376503.27 | 4582372.85 | - | - | +/-* | - | +/-* |
| d3 | 25420954.7 | 7605481.05 | 2594397.36 | 4467554 | 58506164.1 | - | - | - | - | - |
| d4 | 101816555 | 32965289.1 | 6783955.08 | 27349640.6 | 155379070 | - | - | - | - | - |
| d6 | 34945306.6 | 70991648.4 | 22246541 | 67650562.5 | 25723552.7 | - | - | - | - | - |
| d8 | 80298873 | 49668796.9 | 34757926.8 | 78814839.8 | 78008478.5 | - | - | - | +/-** | - |
| d10 | 144696586 | 111306703 | 38121679.7 | 112946297 | 87377156.3 | - | - | - | +/-** | - |
| d12 | 124569492 | 141328207 | 90207750 | 235572539 | 150661313 | - | - | - | - | - |
| d14 | 213685313 | 196068281 | 131103164 | 189603164 | 200032828 | - | - | - | - | - |
| d21 | 415643109 | 368923336 | 176226574 | 416330109 | 484920328 | - | +/-** | - | - | - |
| d28 | 516544219 | 267963838 | 203702109 | 432011162 | 454498242 | - | - | +/- | - | - |
| d35 | 343850801 | 274085947 | 217851431 | 296425840 | 403998223 | - | - | - | - | - |

Note: +/-*: lower than quantification limit (< 6000 copies/ml); +/-**: lower than quantification limit (< 60000 copies/ml); -: lower than detection limit
